# Supplementary material for: First Report of Enterocytozoon hepatopenaei Infection in Pacific Whiteleg Shrimp (Litopenaeus vannamei) Cultured in Korea
Source: MDPI journal article supplement (doi:10.3390/ani11113150), 2021-11-04
Supplement: s1 [file s1]

**Supplementary Table S1.** The spore wall protein (SWP) gene similarity between this study with others in the top ten blast matches

| Accession NO. | Scientific Name             | Description                                                                | Similarity (%) |
|---------------|-----------------------------|----------------------------------------------------------------------------|----------------|
| MG015710      | Enterocytozoon hepatopenaei | Enterocytozoon hepatopenaei spore wall protein 1 (SWP1) mRNA, complete cds | 100            |
| KX258197      | Enterocytozoon hepatopenaei | Enterocytozoon hepatopenaei spore wall protein 1 (SWP) gene, partial cds   | 100            |
| MW000460      | Enterocytozoon hepatopenaei | Enterocytozoon hepatopenaei isolate C spore wall protein gene, partial cds | 100            |
| MW000459      | Enterocytozoon hepatopenaei | Enterocytozoon hepatopenaei isolate B spore wall protein gene, partial cds | 100            |
| MW000458      | Enterocytozoon hepatopenaei | Enterocytozoon hepatopenaei isolate A spore wall protein gene, partial cds | 100            |
| MN308364      | Enterocytozoon hepatopenaei | Enterocytozoon hepatopenaei spore wall protein gene, partial cds           | 100            |
| KY674357      | Enterocytozoon hepatopenaei | Enterocytozoon hepatopenaei spore wall protein 1 gene, partial cds         | 100            |
| MH365434      | Enterocytozoon hepatopenaei | Enterocytozoon hepatopenaei spore wall protein 1 gene, partial cds         | 100            |
| KY593132      | Enterocytozoon hepatopenaei | Enterocytozoon hepatopenaei spore wall protein gene, partial cds           | 100            |
| KY593133      | Enterocytozoon hepatopenaei | Enterocytozoon hepatopenaei spore wall protein gene, partial cds           | 100            |
